# Supplementary material
Source: Springer Nature journal article supplement (https://www.springermedizin.de/resource/supplementary/13058_2011_2870_MOESM8_ESM.pdf/9702772)

# Relapse Free Survival by PTEN Expression

**A**

**All Patients**

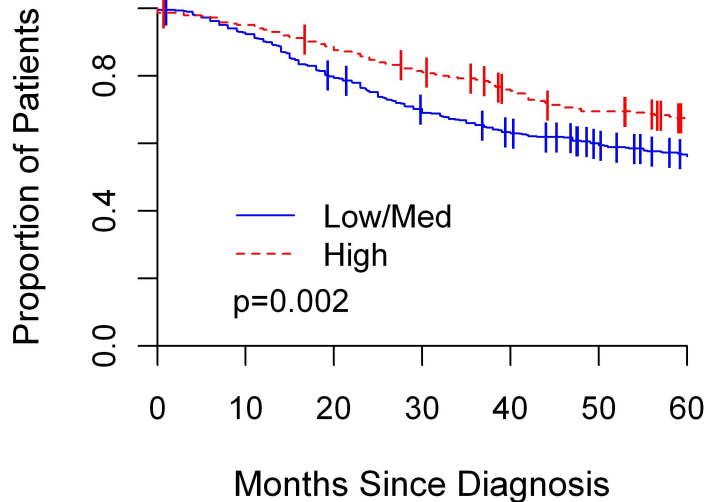

**B**

**Relapsed to Brain**

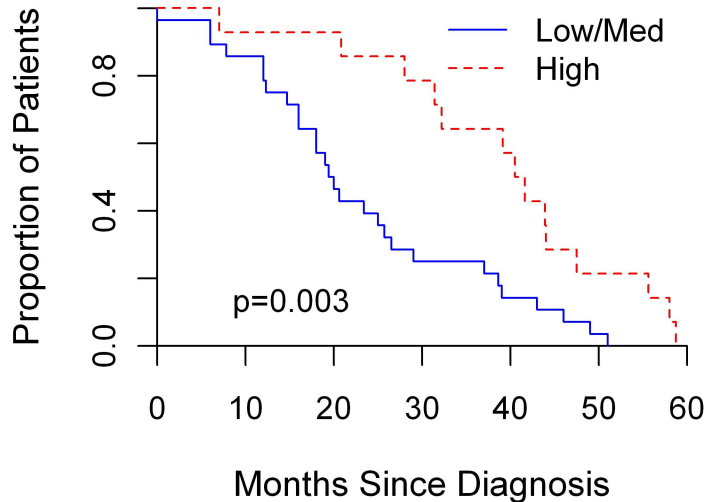

Supplement: MOESM8 [file 9702772]
